**TITLE: Genomic characterization of Crimean-Congo Hemorrhagic Fever Virus detected during nosocomial outbreak (2023) in Balochistan province of Pakistan**

Massab Umair<sup>1\*</sup>, Syed Adnan Haider<sup>1</sup>, Qasim Ali<sup>1</sup>, Rabia Hakim<sup>1</sup>, Maqbool Ahmed Raisani<sup>2</sup>, Adnan Ayub<sup>2</sup>, Muhammad Salman<sup>1</sup>

**Affiliations**

1. National Institutes of Health, Islamabad, Pakistan
2. Provincial Public Health Laboratories, Balochistan, Pakistan

**\*Corresponding author:**

Name: Massab Umair

Address: Department of Virology, National Institutes of Health, 45500, Park Road, Chak Shahzad, Islamabad, Pakistan

Email: [massab.umair@yahoo.com](mailto:massab.umair@yahoo.com)

**WITHDRAWAL STATEMENT**

The authors have withdrawn their manuscript owing to lack of approval by provincial health authorities to publish this work. Therefore, the authors do not wish this work to be cited as reference for the project. If you have any questions, please contact the corresponding author.
